# Supplementary material
Source: PubMed Central journal article supplement (PMC6283478)
Supplement: tpmd170938.SD1.pdf [file tpmd170938.SD1.pdf]

## Supplemental Materials

**Supplemental Table 1. CSF laboratory results.**

| <b>Cerebrospinal fluid*</b>                           |
|-------------------------------------------------------|
| <b>Opening pressure (cm of water):</b> 17             |
| <b>Protein level (mg/dl)<sup>+</sup>:</b> 24          |
| <b>Glucose level (mg/dl)<sup>++</sup>:</b> 67         |
| <b>White cells count (per mm<sup>3</sup>):</b> 1      |
| <b>Polymorphonuclear cells (%):</b> '0'               |
| <b>Neutrophils (%):</b> '0'                           |
| <b>Eosinophils (%):</b> '0'                           |
| <b>Lymphocytes (%):</b> '0'                           |
| <b>Monocytes (%):</b> '0'                             |
| <b>Plasma cells (%):</b> '0'                          |
| <b>Basophils (%):</b> '0'                             |
| <b>Macrophages (%):</b> '0'                           |
| <b>Red cells (per mm<sup>3</sup>):</b> '0'            |
| <b>Gram's staining:</b> No bacteria                   |
| <b>Bacterial culture:</b> No growth                   |
| <b>Fungal culture:</b> No growth                      |
| <b>Neurocysticercosis (ELISA):</b> negative           |
| <b>Neurosyphilis (VDRL, FTA-ABS):</b> negative        |
| <b>Neurotoxoplasmosis (IgG, IgM, ELISA):</b> negative |
| <b>Herpes simplex (IgG, IgM, ELISA):</b> negative     |
| <b>Cytomegalovirus (IgG, IgM, ELISA):</b> negative    |
| <b>Varicella zoster (IgG, IgM, ELISA):</b> negative   |
| <b>Anti HIV (ELISA):</b> negative                     |
| <b>Anti-HTLV I/II (ELISA):</b> negative               |
| <b>Oncotic cytology:</b> negative                     |
| <b>IgG Index:</b> < 0,7                               |

---

**IgM Index:** < 0,061

---

**IgGOCBs:** Not detected

---

**Albumin Quotient:**  $1,0 \times 10^{-3}$

---

\* Collected in 03/09/2016 (tenth day after the first infectious signal)

+ The reference range for protein is 25 to 55 mg per deciliter.

\*\* The reference range for glucose is 45 to 75 mg per deciliter.

**Supplemental Table 2. Results of serum laboratory testing.**

| <b>Serum**</b>                                         |
|--------------------------------------------------------|
| <b>Hemoglobin (g/dl):</b> 11,7                         |
| <b>Hematocrit (%):</b> 33,3                            |
| <b>White cells count (cells/mm<sup>3</sup>):</b> 5.100 |
| <b>Neutrophils (%):</b> 66                             |
| <b>Lymphocytes (%):</b> 28                             |
| <b>Urea (mg/dl)<sup>#</sup>:</b> 25                    |
| <b>Creatinine (mg/dl)<sup>##</sup>:</b> 0,9            |
| <b>ALT (U/L)<sup>∅</sup>:</b> 18                       |
| <b>AST (U/L)<sup>∅∅</sup>:</b> 13                      |
| <b>Total bilirubin (mg/dl)<sup>⊕</sup>:</b> 0,9        |
| <b>Bacterial culture:</b> No growth                    |
| <b>Fungal culture:</b> No growth                       |
| <b>Dengue (ELISA, IgM):</b> not detected               |
| <b>Chikungunya (ELISA/ IgM):</b> not detected          |
| <b>Zika (ELISA/IgM):</b> detected                      |
| <b>Zika (RT-PCR):</b> detected                         |
| <b>AQP4-Ab<sup>***</sup>:</b> Negative                 |
| <b>Anti-MOG<sup>***</sup>:</b> Positive                |

\*\* Collected in 03/09/16

\*\*\* Collected in 05/02/16

# The reference range for urea is 10 to 50 mg per deciliter.

## The reference range for creatinine is 0,7 to 1,5 mg per deciliter.

∅ The reference range for alanine transaminase (ALT) is up to 38 U per liter.

∅∅ The reference range for aspartate transaminase (AST) is up to 41 U per liter.

⊕ The reference range for total bilirubin is 0,2 to 1,2 mg per deciliter.
